# Supplementary material
Source: publisher figshare collection journal article supplement (https://gsajournals.figshare.com/ndownloader/files/27379298)
Supplement: Supplementary file 1 [file 27379298]

## Sheet: Table S4
Supplementary Data 4. InDel calls in a panel of 16 lines
No	Type	Line	Targeted sequencing	PCR	Reference genome
b0000	TE-InDel	B110	indel+
b0000	TE-InDel	B73	indel+		indel+
b0000	TE-InDel	By4960	indel-
b0000	TE-InDel	By804	indel-
b0000	TE-InDel	CI7	indel-
b0000	TE-InDel	CIMBL105	indel-
b0000	TE-InDel	CIMBL114	indel-
b0000	TE-InDel	CIMBL145	indel+
b0000	TE-InDel	Dan340	NA
b0000	TE-InDel	GEMS21	indel+
b0000	TE-InDel	HZS	indel-
b0000	TE-InDel	K22	indel-
b0000	TE-InDel	Mo17	indel-		indel-
b0000	TE-InDel	TY5	indel-
b0000	TE-InDel	Zheng30	indel-
b0000	TE-InDel	Zong31	NA
b0001	TE-InDel	B110	indel-
b0001	TE-InDel	B73	indel+		indel+
b0001	TE-InDel	By4960	indel+
b0001	TE-InDel	By804	indel+
b0001	TE-InDel	CI7	NA
b0001	TE-InDel	CIMBL105	indel+
b0001	TE-InDel	CIMBL114	indel-
b0001	TE-InDel	CIMBL145	indel-
b0001	TE-InDel	Dan340	indel+
b0001	TE-InDel	GEMS21	indel+
b0001	TE-InDel	HZS	indel-
b0001	TE-InDel	K22	indel+
b0001	TE-InDel	Mo17	indel-		indel-
b0001	TE-InDel	TY5	indel+
b0001	TE-InDel	Zheng30	indel+
b0001	TE-InDel	Zong31	indel-
b0002	TE-InDel	B110	NA
b0002	TE-InDel	B73	indel-		indel-
b0002	TE-InDel	By4960	indel-
b0002	TE-InDel	By804	indel-
b0002	TE-InDel	CI7	indel+
b0002	TE-InDel	CIMBL105	indel-
b0002	TE-InDel	CIMBL114	NA
b0002	TE-InDel	CIMBL145	NA
b0002	TE-InDel	Dan340	indel-
b0002	TE-InDel	GEMS21	indel-
b0002	TE-InDel	HZS	NA
b0002	TE-InDel	K22	indel+
b0002	TE-InDel	Mo17	indel+		indel+
b0002	TE-InDel	TY5	indel+
b0002	TE-InDel	Zheng30	NA
b0002	TE-InDel	Zong31	NA
b0003	TE-InDel	B110	indel+
b0003	TE-InDel	B73	indel+		indel+
b0003	TE-InDel	By4960	indel-
b0003	TE-InDel	By804	indel-
b0003	TE-InDel	CI7	indel-
b0003	TE-InDel	CIMBL105	indel-
b0003	TE-InDel	CIMBL114	indel-
b0003	TE-InDel	CIMBL145	indel+
b0003	TE-InDel	Dan340	indel-
b0003	TE-InDel	GEMS21	indel-
b0003	TE-InDel	HZS	indel-
b0003	TE-InDel	K22	indel-
b0003	TE-InDel	Mo17	indel-		indel-
b0003	TE-InDel	TY5	indel-
b0003	TE-InDel	Zheng30	indel-
b0003	TE-InDel	Zong31	indel-
b0004	TE-InDel	B110	indel+
b0004	TE-InDel	B73	indel+		indel+
b0004	TE-InDel	By4960	NA
b0004	TE-InDel	By804	indel-
b0004	TE-InDel	CI7	indel+
b0004	TE-InDel	CIMBL105	indel-
b0004	TE-InDel	CIMBL114	indel-
b0004	TE-InDel	CIMBL145	indel+
b0004	TE-InDel	Dan340	indel-
b0004	TE-InDel	GEMS21	indel-
b0004	TE-InDel	HZS	indel-
b0004	TE-InDel	K22	indel-
b0004	TE-InDel	Mo17	indel-		indel-
b0004	TE-InDel	TY5	indel-
b0004	TE-InDel	Zheng30	indel-
b0004	TE-InDel	Zong31	indel-
b0005	TE-InDel	B110	indel+
b0005	TE-InDel	B73	indel+		indel+
b0005	TE-InDel	By4960	indel-
b0005	TE-InDel	By804	NA
b0005	TE-InDel	CI7	indel-
b0005	TE-InDel	CIMBL105	indel-
b0005	TE-InDel	CIMBL114	indel-
b0005	TE-InDel	CIMBL145	indel+
b0005	TE-InDel	Dan340	indel-
b0005	TE-InDel	GEMS21	indel-
b0005	TE-InDel	HZS	NA
b0005	TE-InDel	K22	NA
b0005	TE-InDel	Mo17	indel-		indel-
b0005	TE-InDel	TY5	indel+
b0005	TE-InDel	Zheng30	indel-
b0005	TE-InDel	Zong31	indel+
b0006	TE-InDel	B110	indel+
b0006	TE-InDel	B73	indel+		indel+
b0006	TE-InDel	By4960	indel-
b0006	TE-InDel	By804	indel-
b0006	TE-InDel	CI7	indel+
b0006	TE-InDel	CIMBL105	indel-
b0006	TE-InDel	CIMBL114	indel-
b0006	TE-InDel	CIMBL145	indel+
b0006	TE-InDel	Dan340	indel-
b0006	TE-InDel	GEMS21	indel-
b0006	TE-InDel	HZS	indel+
b0006	TE-InDel	K22	indel-
b0006	TE-InDel	Mo17	indel-		indel-
b0006	TE-InDel	TY5	indel-
b0006	TE-InDel	Zheng30	indel-
b0006	TE-InDel	Zong31	indel+
b0007	TE-InDel	B110	indel+	indel+
b0007	TE-InDel	B73	indel+	indel+	indel+
b0007	TE-InDel	By4960	indel+	indel+
b0007	TE-InDel	By804	indel-	indel-
b0007	TE-InDel	CI7	indel-	indel-
b0007	TE-InDel	CIMBL105	NA	indel-
b0007	TE-InDel	CIMBL114	indel-	indel-
b0007	TE-InDel	CIMBL145	indel+	indel+
b0007	TE-InDel	Dan340	indel-	indel-
b0007	TE-InDel	GEMS21	NA	indel-
b0007	TE-InDel	HZS	indel-	indel-
b0007	TE-InDel	K22	indel-	NA
b0007	TE-InDel	Mo17	indel-	indel-	indel-
b0007	TE-InDel	TY5	NA	indel-
b0007	TE-InDel	Zheng30	indel-	indel-
b0007	TE-InDel	Zong31	indel+	indel+
b0008	TE-InDel	B110	indel+
b0008	TE-InDel	B73	indel+		indel+
b0008	TE-InDel	By4960	indel-
b0008	TE-InDel	By804	indel-
b0008	TE-InDel	CI7	indel-
b0008	TE-InDel	CIMBL105	NA
b0008	TE-InDel	CIMBL114	indel-
b0008	TE-InDel	CIMBL145	indel+
b0008	TE-InDel	Dan340	NA
b0008	TE-InDel	GEMS21	indel-
b0008	TE-InDel	HZS	indel-
b0008	TE-InDel	K22	indel-
b0008	TE-InDel	Mo17	indel-		indel-
b0008	TE-InDel	TY5	NA
b0008	TE-InDel	Zheng30	indel-
b0008	TE-InDel	Zong31	indel+
b0009	TE-InDel	B110	indel-
b0009	TE-InDel	B73	indel-		indel-
b0009	TE-InDel	By4960	indel+
b0009	TE-InDel	By804	indel+
b0009	TE-InDel	CI7	NA
b0009	TE-InDel	CIMBL105	indel-
b0009	TE-InDel	CIMBL114	NA
b0009	TE-InDel	CIMBL145	indel-
b0009	TE-InDel	Dan340	NA
b0009	TE-InDel	GEMS21	NA
b0009	TE-InDel	HZS	NA
b0009	TE-InDel	K22	NA
b0009	TE-InDel	Mo17	NA		indel+
b0009	TE-InDel	TY5	NA
b0009	TE-InDel	Zheng30	NA
b0009	TE-InDel	Zong31	NA
b0010	TE-InDel	B110	indel-
b0010	TE-InDel	B73	indel-		indel-
b0010	TE-InDel	By4960	indel+
b0010	TE-InDel	By804	indel+
b0010	TE-InDel	CI7	indel-
b0010	TE-InDel	CIMBL105	NA
b0010	TE-InDel	CIMBL114	NA
b0010	TE-InDel	CIMBL145	indel-
b0010	TE-InDel	Dan340	indel-
b0010	TE-InDel	GEMS21	indel-
b0010	TE-InDel	HZS	NA
b0010	TE-InDel	K22	NA
b0010	TE-InDel	Mo17	NA		indel+
b0010	TE-InDel	TY5	indel-
b0010	TE-InDel	Zheng30	NA
b0010	TE-InDel	Zong31	NA
b0011	TE-InDel	B110	indel+
b0011	TE-InDel	B73	indel+		indel+
b0011	TE-InDel	By4960	indel-
b0011	TE-InDel	By804	NA
b0011	TE-InDel	CI7	indel-
b0011	TE-InDel	CIMBL105	indel-
b0011	TE-InDel	CIMBL114	indel-
b0011	TE-InDel	CIMBL145	indel+
b0011	TE-InDel	Dan340	indel-
b0011	TE-InDel	GEMS21	indel+
b0011	TE-InDel	HZS	indel-
b0011	TE-InDel	K22	indel-
b0011	TE-InDel	Mo17	indel-		indel-
b0011	TE-InDel	TY5	indel-
b0011	TE-InDel	Zheng30	indel-
b0011	TE-InDel	Zong31	indel-
b0012	TE-InDel	B110	indel-
b0012	TE-InDel	B73	indel-		indel-
b0012	TE-InDel	By4960	NA
b0012	TE-InDel	By804	indel-
b0012	TE-InDel	CI7	indel+
b0012	TE-InDel	CIMBL105	NA
b0012	TE-InDel	CIMBL114	indel+
b0012	TE-InDel	CIMBL145	indel-
b0012	TE-InDel	Dan340	NA
b0012	TE-InDel	GEMS21	NA
b0012	TE-InDel	HZS	NA
b0012	TE-InDel	K22	indel+
b0012	TE-InDel	Mo17	indel+		indel+
b0012	TE-InDel	TY5	indel+
b0012	TE-InDel	Zheng30	NA
b0012	TE-InDel	Zong31	indel+
b0015	TE-InDel	B110	indel+
b0015	TE-InDel	B73	indel+		indel+
b0015	TE-InDel	By4960	indel-
b0015	TE-InDel	By804	indel-
b0015	TE-InDel	CI7	indel-
b0015	TE-InDel	CIMBL105	indel-
b0015	TE-InDel	CIMBL114	indel+
b0015	TE-InDel	CIMBL145	indel+
b0015	TE-InDel	Dan340	indel-
b0015	TE-InDel	GEMS21	indel+
b0015	TE-InDel	HZS	indel-
b0015	TE-InDel	K22	indel-
b0015	TE-InDel	Mo17	indel-		indel-
b0015	TE-InDel	TY5	indel-
b0015	TE-InDel	Zheng30	indel-
b0015	TE-InDel	Zong31	indel-
b0016	TE-InDel	B110	indel+
b0016	TE-InDel	B73	indel+		indel+
b0016	TE-InDel	By4960	indel-
b0016	TE-InDel	By804	indel+
b0016	TE-InDel	CI7	indel-
b0016	TE-InDel	CIMBL105	indel-
b0016	TE-InDel	CIMBL114	indel-
b0016	TE-InDel	CIMBL145	indel+
b0016	TE-InDel	Dan340	indel+
b0016	TE-InDel	GEMS21	indel+
b0016	TE-InDel	HZS	indel-
b0016	TE-InDel	K22	indel-
b0016	TE-InDel	Mo17	indel-		indel-
b0016	TE-InDel	TY5	indel-
b0016	TE-InDel	Zheng30	indel-
b0016	TE-InDel	Zong31	NA
b0017	TE-InDel	B110	indel-
b0017	TE-InDel	B73	indel-		indel-
b0017	TE-InDel	By4960	indel-
b0017	TE-InDel	By804	indel-
b0017	TE-InDel	CI7	indel-
b0017	TE-InDel	CIMBL105	indel-
b0017	TE-InDel	CIMBL114	indel+
b0017	TE-InDel	CIMBL145	indel-
b0017	TE-InDel	Dan340	NA
b0017	TE-InDel	GEMS21	indel-
b0017	TE-InDel	HZS	indel-
b0017	TE-InDel	K22	indel-
b0017	TE-InDel	Mo17	indel+		indel+
b0017	TE-InDel	TY5	indel-
b0017	TE-InDel	Zheng30	indel-
b0017	TE-InDel	Zong31	indel-
b0019	TE-InDel	B110	indel-
b0019	TE-InDel	B73	indel-		indel-
b0019	TE-InDel	By4960	indel-
b0019	TE-InDel	By804	NA
b0019	TE-InDel	CI7	indel-
b0019	TE-InDel	CIMBL105	indel-
b0019	TE-InDel	CIMBL114	indel-
b0019	TE-InDel	CIMBL145	indel-
b0019	TE-InDel	Dan340	indel-
b0019	TE-InDel	GEMS21	indel-
b0019	TE-InDel	HZS	indel-
b0019	TE-InDel	K22	indel-
b0019	TE-InDel	Mo17	NA		indel+
b0019	TE-InDel	TY5	NA
b0019	TE-InDel	Zheng30	indel-
b0019	TE-InDel	Zong31	indel-
b0020	TE-InDel	B110	indel+
b0020	TE-InDel	B73	indel+		indel+
b0020	TE-InDel	By4960	indel-
b0020	TE-InDel	By804	indel-
b0020	TE-InDel	CI7	indel+
b0020	TE-InDel	CIMBL105	indel-
b0020	TE-InDel	CIMBL114	indel-
b0020	TE-InDel	CIMBL145	indel+
b0020	TE-InDel	Dan340	indel+
b0020	TE-InDel	GEMS21	indel+
b0020	TE-InDel	HZS	indel+
b0020	TE-InDel	K22	indel-
b0020	TE-InDel	Mo17	indel-		indel-
b0020	TE-InDel	TY5	indel+
b0020	TE-InDel	Zheng30	indel-
b0020	TE-InDel	Zong31	indel+
b0021	TE-InDel	B110	indel-
b0021	TE-InDel	B73	indel-		indel-
b0021	TE-InDel	By4960	indel-
b0021	TE-InDel	By804	indel-
b0021	TE-InDel	CI7	indel-
b0021	TE-InDel	CIMBL105	indel-
b0021	TE-InDel	CIMBL114	indel-
b0021	TE-InDel	CIMBL145	indel-
b0021	TE-InDel	Dan340	indel-
b0021	TE-InDel	GEMS21	indel-
b0021	TE-InDel	HZS	indel-
b0021	TE-InDel	K22	indel-
b0021	TE-InDel	Mo17	indel+		indel+
b0021	TE-InDel	TY5	indel-
b0021	TE-InDel	Zheng30	indel-
b0021	TE-InDel	Zong31	indel-
b0022	TE-InDel	B110	indel+
b0022	TE-InDel	B73	indel+		indel+
b0022	TE-InDel	By4960	indel-
b0022	TE-InDel	By804	indel-
b0022	TE-InDel	CI7	indel-
b0022	TE-InDel	CIMBL105	indel-
b0022	TE-InDel	CIMBL114	indel-
b0022	TE-InDel	CIMBL145	indel+
b0022	TE-InDel	Dan340	indel+
b0022	TE-InDel	GEMS21	indel+
b0022	TE-InDel	HZS	NA
b0022	TE-InDel	K22	indel+
b0022	TE-InDel	Mo17	indel-		indel-
b0022	TE-InDel	TY5	indel-
b0022	TE-InDel	Zheng30	indel-
b0022	TE-InDel	Zong31	indel-
b0023	TE-InDel	B110	indel+
b0023	TE-InDel	B73	indel+		indel+
b0023	TE-InDel	By4960	indel-
b0023	TE-InDel	By804	indel-
b0023	TE-InDel	CI7	indel-
b0023	TE-InDel	CIMBL105	indel+
b0023	TE-InDel	CIMBL114	indel-
b0023	TE-InDel	CIMBL145	indel+
b0023	TE-InDel	Dan340	indel-
b0023	TE-InDel	GEMS21	indel+
b0023	TE-InDel	HZS	indel-
b0023	TE-InDel	K22	indel-
b0023	TE-InDel	Mo17	indel-		indel-
b0023	TE-InDel	TY5	NA
b0023	TE-InDel	Zheng30	indel-
b0023	TE-InDel	Zong31	indel-
b0024	TE-InDel	B110	NA
b0024	TE-InDel	B73	indel+		indel+
b0024	TE-InDel	By4960	indel-
b0024	TE-InDel	By804	indel-
b0024	TE-InDel	CI7	indel+
b0024	TE-InDel	CIMBL105	indel+
b0024	TE-InDel	CIMBL114	indel+
b0024	TE-InDel	CIMBL145	indel-
b0024	TE-InDel	Dan340	indel-
b0024	TE-InDel	GEMS21	indel+
b0024	TE-InDel	HZS	indel-
b0024	TE-InDel	K22	indel-
b0024	TE-InDel	Mo17	indel+		indel-
b0024	TE-InDel	TY5	indel+
b0024	TE-InDel	Zheng30	indel-
b0024	TE-InDel	Zong31	NA
b0025	TE-InDel	B110	indel-
b0025	TE-InDel	B73	indel-		indel-
b0025	TE-InDel	By4960	NA
b0025	TE-InDel	By804	indel-
b0025	TE-InDel	CI7	NA
b0025	TE-InDel	CIMBL105	indel-
b0025	TE-InDel	CIMBL114	NA
b0025	TE-InDel	CIMBL145	indel-
b0025	TE-InDel	Dan340	NA
b0025	TE-InDel	GEMS21	indel-
b0025	TE-InDel	HZS	NA
b0025	TE-InDel	K22	indel+
b0025	TE-InDel	Mo17	indel+		indel+
b0025	TE-InDel	TY5	NA
b0025	TE-InDel	Zheng30	NA
b0025	TE-InDel	Zong31	NA
b0026	TE-InDel	B110	indel-
b0026	TE-InDel	B73	indel-		indel-
b0026	TE-InDel	By4960	indel-
b0026	TE-InDel	By804	indel-
b0026	TE-InDel	CI7	indel-
b0026	TE-InDel	CIMBL105	indel-
b0026	TE-InDel	CIMBL114	indel-
b0026	TE-InDel	CIMBL145	indel-
b0026	TE-InDel	Dan340	indel-
b0026	TE-InDel	GEMS21	indel-
b0026	TE-InDel	HZS	indel-
b0026	TE-InDel	K22	indel-
b0026	TE-InDel	Mo17	NA		indel+
b0026	TE-InDel	TY5	indel-
b0026	TE-InDel	Zheng30	indel-
b0026	TE-InDel	Zong31	indel-
b0027	TE-InDel	B110	indel+
b0027	TE-InDel	B73	indel+		indel+
b0027	TE-InDel	By4960	indel+
b0027	TE-InDel	By804	indel+
b0027	TE-InDel	CI7	indel-
b0027	TE-InDel	CIMBL105	indel-
b0027	TE-InDel	CIMBL114	NA
b0027	TE-InDel	CIMBL145	indel+
b0027	TE-InDel	Dan340	indel+
b0027	TE-InDel	GEMS21	indel+
b0027	TE-InDel	HZS	NA
b0027	TE-InDel	K22	indel+
b0027	TE-InDel	Mo17	indel-		indel-
b0027	TE-InDel	TY5	NA
b0027	TE-InDel	Zheng30	indel+
b0027	TE-InDel	Zong31	indel+
b0028	TE-InDel	B110	indel-
b0028	TE-InDel	B73	indel-		indel-
b0028	TE-InDel	By4960	NA
b0028	TE-InDel	By804	NA
b0028	TE-InDel	CI7	NA
b0028	TE-InDel	CIMBL105	indel-
b0028	TE-InDel	CIMBL114	NA
b0028	TE-InDel	CIMBL145	NA
b0028	TE-InDel	Dan340	indel-
b0028	TE-InDel	GEMS21	NA
b0028	TE-InDel	HZS	indel-
b0028	TE-InDel	K22	indel+
b0028	TE-InDel	Mo17	indel+		indel+
b0028	TE-InDel	TY5	NA
b0028	TE-InDel	Zheng30	indel+
b0028	TE-InDel	Zong31	NA
b0029	TE-InDel	B110	indel+
b0029	TE-InDel	B73	indel+		indel+
b0029	TE-InDel	By4960	indel-
b0029	TE-InDel	By804	indel-
b0029	TE-InDel	CI7	indel-
b0029	TE-InDel	CIMBL105	indel-
b0029	TE-InDel	CIMBL114	indel-
b0029	TE-InDel	CIMBL145	indel+
b0029	TE-InDel	Dan340	indel+
b0029	TE-InDel	GEMS21	indel+
b0029	TE-InDel	HZS	indel-
b0029	TE-InDel	K22	indel-
b0029	TE-InDel	Mo17	indel-		indel-
b0029	TE-InDel	TY5	indel-
b0029	TE-InDel	Zheng30	indel-
b0029	TE-InDel	Zong31	indel-
b0030	TE-InDel	B110	indel-
b0030	TE-InDel	B73	indel-		indel-
b0030	TE-InDel	By4960	NA
b0030	TE-InDel	By804	indel+
b0030	TE-InDel	CI7	indel-
b0030	TE-InDel	CIMBL105	NA
b0030	TE-InDel	CIMBL114	indel-
b0030	TE-InDel	CIMBL145	NA
b0030	TE-InDel	Dan340	indel-
b0030	TE-InDel	GEMS21	indel-
b0030	TE-InDel	HZS	indel-
b0030	TE-InDel	K22	indel+
b0030	TE-InDel	Mo17	indel+		indel+
b0030	TE-InDel	TY5	NA
b0030	TE-InDel	Zheng30	indel+
b0030	TE-InDel	Zong31	indel-
b0031	TE-InDel	B110	indel+
b0031	TE-InDel	B73	indel+		indel+
b0031	TE-InDel	By4960	indel-
b0031	TE-InDel	By804	indel+
b0031	TE-InDel	CI7	indel-
b0031	TE-InDel	CIMBL105	indel-
b0031	TE-InDel	CIMBL114	indel-
b0031	TE-InDel	CIMBL145	indel+
b0031	TE-InDel	Dan340	indel+
b0031	TE-InDel	GEMS21	indel+
b0031	TE-InDel	HZS	indel+
b0031	TE-InDel	K22	indel-
b0031	TE-InDel	Mo17	indel-		indel-
b0031	TE-InDel	TY5	NA
b0031	TE-InDel	Zheng30	indel+
b0031	TE-InDel	Zong31	indel+
b0032	TE-InDel	B110	indel-
b0032	TE-InDel	B73	indel-		indel-
b0032	TE-InDel	By4960	indel-
b0032	TE-InDel	By804	indel-
b0032	TE-InDel	CI7	indel-
b0032	TE-InDel	CIMBL105	NA
b0032	TE-InDel	CIMBL114	NA
b0032	TE-InDel	CIMBL145	indel-
b0032	TE-InDel	Dan340	indel-
b0032	TE-InDel	GEMS21	indel-
b0032	TE-InDel	HZS	NA
b0032	TE-InDel	K22	NA
b0032	TE-InDel	Mo17	NA		indel+
b0032	TE-InDel	TY5	indel-
b0032	TE-InDel	Zheng30	indel-
b0032	TE-InDel	Zong31	indel-
b0033	TE-InDel	B110	indel-
b0033	TE-InDel	B73	indel-		indel-
b0033	TE-InDel	By4960	NA
b0033	TE-InDel	By804	NA
b0033	TE-InDel	CI7	NA
b0033	TE-InDel	CIMBL105	indel-
b0033	TE-InDel	CIMBL114	NA
b0033	TE-InDel	CIMBL145	indel-
b0033	TE-InDel	Dan340	indel-
b0033	TE-InDel	GEMS21	indel-
b0033	TE-InDel	HZS	NA
b0033	TE-InDel	K22	NA
b0033	TE-InDel	Mo17	indel+		indel+
b0033	TE-InDel	TY5	NA
b0033	TE-InDel	Zheng30	indel-
b0033	TE-InDel	Zong31	NA
b0034	TE-InDel	B110	indel+
b0034	TE-InDel	B73	indel+		indel+
b0034	TE-InDel	By4960	NA
b0034	TE-InDel	By804	NA
b0034	TE-InDel	CI7	indel-
b0034	TE-InDel	CIMBL105	indel-
b0034	TE-InDel	CIMBL114	NA
b0034	TE-InDel	CIMBL145	indel+
b0034	TE-InDel	Dan340	indel+
b0034	TE-InDel	GEMS21	indel+
b0034	TE-InDel	HZS	indel-
b0034	TE-InDel	K22	NA
b0034	TE-InDel	Mo17	indel-		indel-
b0034	TE-InDel	TY5	indel-
b0034	TE-InDel	Zheng30	indel+
b0034	TE-InDel	Zong31	indel-
b0035	TE-InDel	B110	indel-
b0035	TE-InDel	B73	indel-		indel-
b0035	TE-InDel	By4960	indel-
b0035	TE-InDel	By804	indel-
b0035	TE-InDel	CI7	indel-
b0035	TE-InDel	CIMBL105	indel-
b0035	TE-InDel	CIMBL114	indel-
b0035	TE-InDel	CIMBL145	indel-
b0035	TE-InDel	Dan340	indel-
b0035	TE-InDel	GEMS21	indel-
b0035	TE-InDel	HZS	indel-
b0035	TE-InDel	K22	indel-
b0035	TE-InDel	Mo17	indel+		indel+
b0035	TE-InDel	TY5	indel-
b0035	TE-InDel	Zheng30	indel-
b0035	TE-InDel	Zong31	indel-
b0036	TE-InDel	B110	indel-
b0036	TE-InDel	B73	indel-		indel-
b0036	TE-InDel	By4960	NA
b0036	TE-InDel	By804	indel-
b0036	TE-InDel	CI7	indel-
b0036	TE-InDel	CIMBL105	indel-
b0036	TE-InDel	CIMBL114	NA
b0036	TE-InDel	CIMBL145	indel-
b0036	TE-InDel	Dan340	indel-
b0036	TE-InDel	GEMS21	indel-
b0036	TE-InDel	HZS	indel-
b0036	TE-InDel	K22	indel-
b0036	TE-InDel	Mo17	NA		indel+
b0036	TE-InDel	TY5	indel+
b0036	TE-InDel	Zheng30	indel-
b0036	TE-InDel	Zong31	indel-
b0037	TE-InDel	B110	indel-
b0037	TE-InDel	B73	indel-		indel-
b0037	TE-InDel	By4960	NA
b0037	TE-InDel	By804	indel-
b0037	TE-InDel	CI7	indel-
b0037	TE-InDel	CIMBL105	NA
b0037	TE-InDel	CIMBL114	NA
b0037	TE-InDel	CIMBL145	indel-
b0037	TE-InDel	Dan340	NA
b0037	TE-InDel	GEMS21	indel-
b0037	TE-InDel	HZS	NA
b0037	TE-InDel	K22	NA
b0037	TE-InDel	Mo17	NA		indel+
b0037	TE-InDel	TY5	indel+
b0037	TE-InDel	Zheng30	indel+
b0037	TE-InDel	Zong31	NA
b0038	TE-InDel	B110	indel-
b0038	TE-InDel	B73	indel-		indel-
b0038	TE-InDel	By4960	NA
b0038	TE-InDel	By804	indel-
b0038	TE-InDel	CI7	NA
b0038	TE-InDel	CIMBL105	NA
b0038	TE-InDel	CIMBL114	NA
b0038	TE-InDel	CIMBL145	indel-
b0038	TE-InDel	Dan340	NA
b0038	TE-InDel	GEMS21	indel-
b0038	TE-InDel	HZS	indel-
b0038	TE-InDel	K22	NA
b0038	TE-InDel	Mo17	NA		indel+
b0038	TE-InDel	TY5	NA
b0038	TE-InDel	Zheng30	NA
b0038	TE-InDel	Zong31	NA
b0040	TE-InDel	B110	NA
b0040	TE-InDel	B73	indel-		indel-
b0040	TE-InDel	By4960	indel-
b0040	TE-InDel	By804	indel-
b0040	TE-InDel	CI7	NA
b0040	TE-InDel	CIMBL105	indel-
b0040	TE-InDel	CIMBL114	indel-
b0040	TE-InDel	CIMBL145	indel-
b0040	TE-InDel	Dan340	NA
b0040	TE-InDel	GEMS21	indel-
b0040	TE-InDel	HZS	indel-
b0040	TE-InDel	K22	indel-
b0040	TE-InDel	Mo17	indel+		indel+
b0040	TE-InDel	TY5	NA
b0040	TE-InDel	Zheng30	NA
b0040	TE-InDel	Zong31	indel-
b0041	TE-InDel	B110	NA
b0041	TE-InDel	B73	indel-		indel-
b0041	TE-InDel	By4960	indel+
b0041	TE-InDel	By804	NA
b0041	TE-InDel	CI7	NA
b0041	TE-InDel	CIMBL105	indel-
b0041	TE-InDel	CIMBL114	indel-
b0041	TE-InDel	CIMBL145	NA
b0041	TE-InDel	Dan340	indel+
b0041	TE-InDel	GEMS21	indel-
b0041	TE-InDel	HZS	NA
b0041	TE-InDel	K22	NA
b0041	TE-InDel	Mo17	indel+		indel+
b0041	TE-InDel	TY5	indel+
b0041	TE-InDel	Zheng30	indel+
b0041	TE-InDel	Zong31	NA
b0042	TE-InDel	B110	indel-
b0042	TE-InDel	B73	indel-		indel-
b0042	TE-InDel	By4960	indel-
b0042	TE-InDel	By804	indel-
b0042	TE-InDel	CI7	NA
b0042	TE-InDel	CIMBL105	indel-
b0042	TE-InDel	CIMBL114	NA
b0042	TE-InDel	CIMBL145	indel-
b0042	TE-InDel	Dan340	NA
b0042	TE-InDel	GEMS21	indel-
b0042	TE-InDel	HZS	NA
b0042	TE-InDel	K22	indel-
b0042	TE-InDel	Mo17	indel+		indel+
b0042	TE-InDel	TY5	indel-
b0042	TE-InDel	Zheng30	NA
b0042	TE-InDel	Zong31	NA
b0043	TE-InDel	B110	indel+
b0043	TE-InDel	B73	NA		indel+
b0043	TE-InDel	By4960	NA
b0043	TE-InDel	By804	indel-
b0043	TE-InDel	CI7	indel+
b0043	TE-InDel	CIMBL105	indel-
b0043	TE-InDel	CIMBL114	indel-
b0043	TE-InDel	CIMBL145	indel+
b0043	TE-InDel	Dan340	indel-
b0043	TE-InDel	GEMS21	indel+
b0043	TE-InDel	HZS	indel-
b0043	TE-InDel	K22	indel-
b0043	TE-InDel	Mo17	indel-		indel-
b0043	TE-InDel	TY5	indel+
b0043	TE-InDel	Zheng30	indel-
b0043	TE-InDel	Zong31	indel+
b0044	TE-InDel	B110	indel-
b0044	TE-InDel	B73	indel+		indel+
b0044	TE-InDel	By4960	indel-
b0044	TE-InDel	By804	indel-
b0044	TE-InDel	CI7	indel-
b0044	TE-InDel	CIMBL105	indel-
b0044	TE-InDel	CIMBL114	indel-
b0044	TE-InDel	CIMBL145	indel+
b0044	TE-InDel	Dan340	NA
b0044	TE-InDel	GEMS21	indel+
b0044	TE-InDel	HZS	indel-
b0044	TE-InDel	K22	indel-
b0044	TE-InDel	Mo17	indel-		indel-
b0044	TE-InDel	TY5	indel-
b0044	TE-InDel	Zheng30	indel-
b0044	TE-InDel	Zong31	indel-
b0045	TE-InDel	B110	indel-
b0045	TE-InDel	B73	indel+		indel+
b0045	TE-InDel	By4960	indel-
b0045	TE-InDel	By804	indel-
b0045	TE-InDel	CI7	indel-
b0045	TE-InDel	CIMBL105	indel-
b0045	TE-InDel	CIMBL114	indel-
b0045	TE-InDel	CIMBL145	indel+
b0045	TE-InDel	Dan340	indel-
b0045	TE-InDel	GEMS21	indel+
b0045	TE-InDel	HZS	NA
b0045	TE-InDel	K22	indel-
b0045	TE-InDel	Mo17	indel-		indel-
b0045	TE-InDel	TY5	indel-
b0045	TE-InDel	Zheng30	indel-
b0045	TE-InDel	Zong31	indel-
b0049	TE-InDel	B110	NA
b0049	TE-InDel	B73	indel-		indel-
b0049	TE-InDel	By4960	NA
b0049	TE-InDel	By804	NA
b0049	TE-InDel	CI7	NA
b0049	TE-InDel	CIMBL105	NA
b0049	TE-InDel	CIMBL114	NA
b0049	TE-InDel	CIMBL145	NA
b0049	TE-InDel	Dan340	NA
b0049	TE-InDel	GEMS21	indel-
b0049	TE-InDel	HZS	NA
b0049	TE-InDel	K22	NA
b0049	TE-InDel	Mo17	NA		indel+
b0049	TE-InDel	TY5	NA
b0049	TE-InDel	Zheng30	NA
b0049	TE-InDel	Zong31	NA
b0050	TE-InDel	B110	NA
b0050	TE-InDel	B73	NA		indel-
b0050	TE-InDel	By4960	NA
b0050	TE-InDel	By804	indel-
b0050	TE-InDel	CI7	NA
b0050	TE-InDel	CIMBL105	NA
b0050	TE-InDel	CIMBL114	NA
b0050	TE-InDel	CIMBL145	indel-
b0050	TE-InDel	Dan340	indel-
b0050	TE-InDel	GEMS21	indel-
b0050	TE-InDel	HZS	indel-
b0050	TE-InDel	K22	NA
b0050	TE-InDel	Mo17	indel+		indel+
b0050	TE-InDel	TY5	NA
b0050	TE-InDel	Zheng30	NA
b0050	TE-InDel	Zong31	NA
b0051	TE-InDel	B110	indel+
b0051	TE-InDel	B73	indel+		indel+
b0051	TE-InDel	By4960	indel-
b0051	TE-InDel	By804	indel+
b0051	TE-InDel	CI7	indel-
b0051	TE-InDel	CIMBL105	indel-
b0051	TE-InDel	CIMBL114	NA
b0051	TE-InDel	CIMBL145	indel-
b0051	TE-InDel	Dan340	indel-
b0051	TE-InDel	GEMS21	indel+
b0051	TE-InDel	HZS	indel-
b0051	TE-InDel	K22	NA
b0051	TE-InDel	Mo17	indel-		indel-
b0051	TE-InDel	TY5	indel+
b0051	TE-InDel	Zheng30	indel-
b0051	TE-InDel	Zong31	NA
b0052	TE-InDel	B110	indel+
b0052	TE-InDel	B73	indel+		indel+
b0052	TE-InDel	By4960	indel-
b0052	TE-InDel	By804	indel+
b0052	TE-InDel	CI7	indel-
b0052	TE-InDel	CIMBL105	indel-
b0052	TE-InDel	CIMBL114	indel-
b0052	TE-InDel	CIMBL145	indel-
b0052	TE-InDel	Dan340	indel-
b0052	TE-InDel	GEMS21	indel+
b0052	TE-InDel	HZS	NA
b0052	TE-InDel	K22	indel-
b0052	TE-InDel	Mo17	indel-		indel-
b0052	TE-InDel	TY5	indel+
b0052	TE-InDel	Zheng30	indel-
b0052	TE-InDel	Zong31	indel-
b0056	TE-InDel	B110	indel+
b0056	TE-InDel	B73	indel-		indel-
b0056	TE-InDel	By4960	indel+
b0056	TE-InDel	By804	indel+
b0056	TE-InDel	CI7	indel+
b0056	TE-InDel	CIMBL105	NA
b0056	TE-InDel	CIMBL114	NA
b0056	TE-InDel	CIMBL145	indel+
b0056	TE-InDel	Dan340	indel+
b0056	TE-InDel	GEMS21	indel-
b0056	TE-InDel	HZS	NA
b0056	TE-InDel	K22	indel+
b0056	TE-InDel	Mo17	NA		indel+
b0056	TE-InDel	TY5	indel+
b0056	TE-InDel	Zheng30	NA
b0056	TE-InDel	Zong31	indel+
b0057	TE-InDel	B110	indel-	indel-
b0057	TE-InDel	B73	indel+	indel+	indel+
b0057	TE-InDel	By4960	NA	indel-
b0057	TE-InDel	By804	indel-	indel-
b0057	TE-InDel	CI7	indel-	indel-
b0057	TE-InDel	CIMBL105	indel-	indel-
b0057	TE-InDel	CIMBL114	indel-	indel-
b0057	TE-InDel	CIMBL145	NA	indel-
b0057	TE-InDel	Dan340	indel-	indel-
b0057	TE-InDel	GEMS21	indel+	indel+
b0057	TE-InDel	HZS	indel+	indel+
b0057	TE-InDel	K22	indel-	NA
b0057	TE-InDel	Mo17	indel-	indel-	indel-
b0057	TE-InDel	TY5	indel-	indel-
b0057	TE-InDel	Zheng30	indel-	indel-
b0057	TE-InDel	Zong31	indel-	indel-
b0058	TE-InDel	B110	indel+
b0058	TE-InDel	B73	indel-		indel-
b0058	TE-InDel	By4960	indel+
b0058	TE-InDel	By804	indel+
b0058	TE-InDel	CI7	indel+
b0058	TE-InDel	CIMBL105	indel+
b0058	TE-InDel	CIMBL114	indel+
b0058	TE-InDel	CIMBL145	indel+
b0058	TE-InDel	Dan340	indel-
b0058	TE-InDel	GEMS21	indel-
b0058	TE-InDel	HZS	indel+
b0058	TE-InDel	K22	NA
b0058	TE-InDel	Mo17	indel+		indel+
b0058	TE-InDel	TY5	indel+
b0058	TE-InDel	Zheng30	indel+
b0058	TE-InDel	Zong31	NA
b0059	TE-InDel	B110	indel-
b0059	TE-InDel	B73	indel+		indel+
b0059	TE-InDel	By4960	indel-
b0059	TE-InDel	By804	indel-
b0059	TE-InDel	CI7	indel-
b0059	TE-InDel	CIMBL105	indel-
b0059	TE-InDel	CIMBL114	indel-
b0059	TE-InDel	CIMBL145	indel-
b0059	TE-InDel	Dan340	indel-
b0059	TE-InDel	GEMS21	indel+
b0059	TE-InDel	HZS	indel-
b0059	TE-InDel	K22	indel-
b0059	TE-InDel	Mo17	indel-		indel-
b0059	TE-InDel	TY5	indel-
b0059	TE-InDel	Zheng30	indel-
b0059	TE-InDel	Zong31	indel-
b0060	TE-InDel	B110	NA
b0060	TE-InDel	B73	indel-		indel-
b0060	TE-InDel	By4960	indel-
b0060	TE-InDel	By804	NA
b0060	TE-InDel	CI7	indel-
b0060	TE-InDel	CIMBL105	NA
b0060	TE-InDel	CIMBL114	NA
b0060	TE-InDel	CIMBL145	indel+
b0060	TE-InDel	Dan340	indel-
b0060	TE-InDel	GEMS21	indel-
b0060	TE-InDel	HZS	indel-
b0060	TE-InDel	K22	NA
b0060	TE-InDel	Mo17	NA		indel+
b0060	TE-InDel	TY5	indel+
b0060	TE-InDel	Zheng30	NA
b0060	TE-InDel	Zong31	indel-
b0061	TE-InDel	B110	NA	indel+
b0061	TE-InDel	B73	indel+	indel+	indel+
b0061	TE-InDel	By4960	indel-	indel-
b0061	TE-InDel	By804	indel-	indel-
b0061	TE-InDel	CI7	indel-	indel-
b0061	TE-InDel	CIMBL105	indel-	indel-
b0061	TE-InDel	CIMBL114	indel-	indel-
b0061	TE-InDel	CIMBL145	NA	indel-
b0061	TE-InDel	Dan340	indel-	indel-
b0061	TE-InDel	GEMS21	indel+	indel+
b0061	TE-InDel	HZS	indel-	indel-
b0061	TE-InDel	K22	indel-	NA
b0061	TE-InDel	Mo17	indel-	indel-	indel-
b0061	TE-InDel	TY5	NA	indel-
b0061	TE-InDel	Zheng30	NA	indel+
b0061	TE-InDel	Zong31	indel-	indel-
b0062	TE-InDel	B110	indel+
b0062	TE-InDel	B73	indel+		indel+
b0062	TE-InDel	By4960	indel+
b0062	TE-InDel	By804	indel+
b0062	TE-InDel	CI7	NA
b0062	TE-InDel	CIMBL105	indel-
b0062	TE-InDel	CIMBL114	indel-
b0062	TE-InDel	CIMBL145	indel+
b0062	TE-InDel	Dan340	indel+
b0062	TE-InDel	GEMS21	indel+
b0062	TE-InDel	HZS	indel-
b0062	TE-InDel	K22	indel-
b0062	TE-InDel	Mo17	indel-		indel-
b0062	TE-InDel	TY5	indel-
b0062	TE-InDel	Zheng30	indel-
b0062	TE-InDel	Zong31	indel-
b0063	TE-InDel	B110	indel+
b0063	TE-InDel	B73	indel+		indel+
b0063	TE-InDel	By4960	indel+
b0063	TE-InDel	By804	NA
b0063	TE-InDel	CI7	indel-
b0063	TE-InDel	CIMBL105	indel-
b0063	TE-InDel	CIMBL114	indel-
b0063	TE-InDel	CIMBL145	indel+
b0063	TE-InDel	Dan340	indel+
b0063	TE-InDel	GEMS21	indel+
b0063	TE-InDel	HZS	indel-
b0063	TE-InDel	K22	indel-
b0063	TE-InDel	Mo17	indel-		indel-
b0063	TE-InDel	TY5	indel-
b0063	TE-InDel	Zheng30	indel-
b0063	TE-InDel	Zong31	indel-
b0064	TE-InDel	B110	indel-	indel-
b0064	TE-InDel	B73	indel-	indel-	indel-
b0064	TE-InDel	By4960	indel-	indel-
b0064	TE-InDel	By804	NA	indel-
b0064	TE-InDel	CI7	indel+	indel+
b0064	TE-InDel	CIMBL105	indel-	indel-
b0064	TE-InDel	CIMBL114	indel-	indel-
b0064	TE-InDel	CIMBL145	indel-	indel-
b0064	TE-InDel	Dan340	NA	indel-
b0064	TE-InDel	GEMS21	indel-	indel-
b0064	TE-InDel	HZS	indel-	indel-
b0064	TE-InDel	K22	NA	NA
b0064	TE-InDel	Mo17	indel+	indel+	indel+
b0064	TE-InDel	TY5	NA	indel-
b0064	TE-InDel	Zheng30	indel+	indel+
b0064	TE-InDel	Zong31	indel+	indel+
b0065	TE-InDel	B110	indel-
b0065	TE-InDel	B73	indel+		indel+
b0065	TE-InDel	By4960	indel-
b0065	TE-InDel	By804	indel-
b0065	TE-InDel	CI7	indel-
b0065	TE-InDel	CIMBL105	indel-
b0065	TE-InDel	CIMBL114	indel-
b0065	TE-InDel	CIMBL145	NA
b0065	TE-InDel	Dan340	indel-
b0065	TE-InDel	GEMS21	indel+
b0065	TE-InDel	HZS	indel-
b0065	TE-InDel	K22	indel-
b0065	TE-InDel	Mo17	indel-		indel-
b0065	TE-InDel	TY5	indel-
b0065	TE-InDel	Zheng30	indel-
b0065	TE-InDel	Zong31	indel-
b0066	TE-InDel	B110	indel-
b0066	TE-InDel	B73	indel-		indel-
b0066	TE-InDel	By4960	indel-
b0066	TE-InDel	By804	NA
b0066	TE-InDel	CI7	NA
b0066	TE-InDel	CIMBL105	indel+
b0066	TE-InDel	CIMBL114	NA
b0066	TE-InDel	CIMBL145	indel-
b0066	TE-InDel	Dan340	NA
b0066	TE-InDel	GEMS21	indel-
b0066	TE-InDel	HZS	indel-
b0066	TE-InDel	K22	indel-
b0066	TE-InDel	Mo17	indel+		indel+
b0066	TE-InDel	TY5	indel-
b0066	TE-InDel	Zheng30	NA
b0066	TE-InDel	Zong31	indel-
b0067	TE-InDel	B110	indel+
b0067	TE-InDel	B73	indel-		indel-
b0067	TE-InDel	By4960	indel+
b0067	TE-InDel	By804	NA
b0067	TE-InDel	CI7	indel+
b0067	TE-InDel	CIMBL105	NA
b0067	TE-InDel	CIMBL114	NA
b0067	TE-InDel	CIMBL145	indel+
b0067	TE-InDel	Dan340	indel+
b0067	TE-InDel	GEMS21	indel-
b0067	TE-InDel	HZS	NA
b0067	TE-InDel	K22	indel-
b0067	TE-InDel	Mo17	NA		indel+
b0067	TE-InDel	TY5	indel+
b0067	TE-InDel	Zheng30	indel+
b0067	TE-InDel	Zong31	NA
b0068	TE-InDel	B110	indel+
b0068	TE-InDel	B73	indel+		indel+
b0068	TE-InDel	By4960	indel+
b0068	TE-InDel	By804	indel-
b0068	TE-InDel	CI7	NA
b0068	TE-InDel	CIMBL105	indel+
b0068	TE-InDel	CIMBL114	NA
b0068	TE-InDel	CIMBL145	indel+
b0068	TE-InDel	Dan340	indel+
b0068	TE-InDel	GEMS21	indel+
b0068	TE-InDel	HZS	indel+
b0068	TE-InDel	K22	indel+
b0068	TE-InDel	Mo17	indel-		indel-
b0068	TE-InDel	TY5	NA
b0068	TE-InDel	Zheng30	indel-
b0068	TE-InDel	Zong31	indel+
b0069	TE-InDel	B110	indel-
b0069	TE-InDel	B73	indel-		indel-
b0069	TE-InDel	By4960	NA
b0069	TE-InDel	By804	indel-
b0069	TE-InDel	CI7	NA
b0069	TE-InDel	CIMBL105	indel-
b0069	TE-InDel	CIMBL114	indel-
b0069	TE-InDel	CIMBL145	indel-
b0069	TE-InDel	Dan340	indel-
b0069	TE-InDel	GEMS21	indel-
b0069	TE-InDel	HZS	indel-
b0069	TE-InDel	K22	indel-
b0069	TE-InDel	Mo17	indel+		indel+
b0069	TE-InDel	TY5	NA
b0069	TE-InDel	Zheng30	indel+
b0069	TE-InDel	Zong31	NA
b0070	TE-InDel	B110	indel+
b0070	TE-InDel	B73	indel+		indel+
b0070	TE-InDel	By4960	indel-
b0070	TE-InDel	By804	indel-
b0070	TE-InDel	CI7	NA
b0070	TE-InDel	CIMBL105	indel-
b0070	TE-InDel	CIMBL114	indel-
b0070	TE-InDel	CIMBL145	indel+
b0070	TE-InDel	Dan340	indel-
b0070	TE-InDel	GEMS21	indel+
b0070	TE-InDel	HZS	indel-
b0070	TE-InDel	K22	indel+
b0070	TE-InDel	Mo17	indel-		indel-
b0070	TE-InDel	TY5	indel-
b0070	TE-InDel	Zheng30	NA
b0070	TE-InDel	Zong31	NA
b0071	TE-InDel	B110	indel+
b0071	TE-InDel	B73	indel+		indel+
b0071	TE-InDel	By4960	indel-
b0071	TE-InDel	By804	indel-
b0071	TE-InDel	CI7	indel-
b0071	TE-InDel	CIMBL105	indel-
b0071	TE-InDel	CIMBL114	indel-
b0071	TE-InDel	CIMBL145	indel+
b0071	TE-InDel	Dan340	indel-
b0071	TE-InDel	GEMS21	indel+
b0071	TE-InDel	HZS	indel-
b0071	TE-InDel	K22	indel+
b0071	TE-InDel	Mo17	indel-		indel-
b0071	TE-InDel	TY5	indel-
b0071	TE-InDel	Zheng30	indel-
b0071	TE-InDel	Zong31	indel-
b0072	TE-InDel	B110	indel-
b0072	TE-InDel	B73	indel-		indel-
b0072	TE-InDel	By4960	indel-
b0072	TE-InDel	By804	NA
b0072	TE-InDel	CI7	indel+
b0072	TE-InDel	CIMBL105	NA
b0072	TE-InDel	CIMBL114	NA
b0072	TE-InDel	CIMBL145	indel+
b0072	TE-InDel	Dan340	indel+
b0072	TE-InDel	GEMS21	indel-
b0072	TE-InDel	HZS	NA
b0072	TE-InDel	K22	NA
b0072	TE-InDel	Mo17	indel+		indel+
b0072	TE-InDel	TY5	indel+
b0072	TE-InDel	Zheng30	indel+
b0072	TE-InDel	Zong31	indel+
b0073	TE-InDel	B110	indel+
b0073	TE-InDel	B73	indel+		indel+
b0073	TE-InDel	By4960	indel-
b0073	TE-InDel	By804	indel-
b0073	TE-InDel	CI7	indel+
b0073	TE-InDel	CIMBL105	indel+
b0073	TE-InDel	CIMBL114	indel-
b0073	TE-InDel	CIMBL145	indel-
b0073	TE-InDel	Dan340	NA
b0073	TE-InDel	GEMS21	indel+
b0073	TE-InDel	HZS	indel-
b0073	TE-InDel	K22	indel-
b0073	TE-InDel	Mo17	indel-		indel-
b0073	TE-InDel	TY5	NA
b0073	TE-InDel	Zheng30	indel-
b0073	TE-InDel	Zong31	indel+
b0074	TE-InDel	B110	indel+
b0074	TE-InDel	B73	indel+		indel+
b0074	TE-InDel	By4960	indel+
b0074	TE-InDel	By804	indel+
b0074	TE-InDel	CI7	indel-
b0074	TE-InDel	CIMBL105	indel-
b0074	TE-InDel	CIMBL114	indel-
b0074	TE-InDel	CIMBL145	indel-
b0074	TE-InDel	Dan340	indel+
b0074	TE-InDel	GEMS21	indel+
b0074	TE-InDel	HZS	NA
b0074	TE-InDel	K22	indel+
b0074	TE-InDel	Mo17	indel-		indel-
b0074	TE-InDel	TY5	NA
b0074	TE-InDel	Zheng30	indel-
b0074	TE-InDel	Zong31	indel+
b0077	TE-InDel	B110	indel-
b0077	TE-InDel	B73	indel-		indel-
b0077	TE-InDel	By4960	indel+
b0077	TE-InDel	By804	indel+
b0077	TE-InDel	CI7	NA
b0077	TE-InDel	CIMBL105	NA
b0077	TE-InDel	CIMBL114	NA
b0077	TE-InDel	CIMBL145	NA
b0077	TE-InDel	Dan340	NA
b0077	TE-InDel	GEMS21	indel-
b0077	TE-InDel	HZS	NA
b0077	TE-InDel	K22	NA
b0077	TE-InDel	Mo17	NA		indel+
b0077	TE-InDel	TY5	indel+
b0077	TE-InDel	Zheng30	indel-
b0077	TE-InDel	Zong31	indel+
b0078	TE-InDel	B110	indel+
b0078	TE-InDel	B73	indel+		indel+
b0078	TE-InDel	By4960	indel-
b0078	TE-InDel	By804	indel-
b0078	TE-InDel	CI7	indel-
b0078	TE-InDel	CIMBL105	indel-
b0078	TE-InDel	CIMBL114	indel-
b0078	TE-InDel	CIMBL145	indel+
b0078	TE-InDel	Dan340	NA
b0078	TE-InDel	GEMS21	indel+
b0078	TE-InDel	HZS	indel-
b0078	TE-InDel	K22	indel-
b0078	TE-InDel	Mo17	indel-		indel-
b0078	TE-InDel	TY5	indel-
b0078	TE-InDel	Zheng30	indel-
b0078	TE-InDel	Zong31	indel-
b0079	TE-InDel	B110	NA
b0079	TE-InDel	B73	indel-		indel-
b0079	TE-InDel	By4960	indel+
b0079	TE-InDel	By804	indel+
b0079	TE-InDel	CI7	NA
b0079	TE-InDel	CIMBL105	NA
b0079	TE-InDel	CIMBL114	indel+
b0079	TE-InDel	CIMBL145	indel-
b0079	TE-InDel	Dan340	indel-
b0079	TE-InDel	GEMS21	indel-
b0079	TE-InDel	HZS	indel+
b0079	TE-InDel	K22	indel+
b0079	TE-InDel	Mo17	indel+		indel+
b0079	TE-InDel	TY5	indel-
b0079	TE-InDel	Zheng30	NA
b0079	TE-InDel	Zong31	NA
b0080	TE-InDel	B110	NA
b0080	TE-InDel	B73	indel-		indel-
b0080	TE-InDel	By4960	NA
b0080	TE-InDel	By804	NA
b0080	TE-InDel	CI7	NA
b0080	TE-InDel	CIMBL105	NA
b0080	TE-InDel	CIMBL114	indel+
b0080	TE-InDel	CIMBL145	indel-
b0080	TE-InDel	Dan340	NA
b0080	TE-InDel	GEMS21	indel-
b0080	TE-InDel	HZS	NA
b0080	TE-InDel	K22	indel+
b0080	TE-InDel	Mo17	indel+		indel+
b0080	TE-InDel	TY5	NA
b0080	TE-InDel	Zheng30	NA
b0080	TE-InDel	Zong31	NA
b0081	TE-InDel	B110	indel-
b0081	TE-InDel	B73	indel-		indel-
b0081	TE-InDel	By4960	indel-
b0081	TE-InDel	By804	indel-
b0081	TE-InDel	CI7	NA
b0081	TE-InDel	CIMBL105	indel-
b0081	TE-InDel	CIMBL114	NA
b0081	TE-InDel	CIMBL145	indel-
b0081	TE-InDel	Dan340	NA
b0081	TE-InDel	GEMS21	indel-
b0081	TE-InDel	HZS	NA
b0081	TE-InDel	K22	NA
b0081	TE-InDel	Mo17	indel+		indel+
b0081	TE-InDel	TY5	indel-
b0081	TE-InDel	Zheng30	indel-
b0081	TE-InDel	Zong31	NA
b0082	TE-InDel	B110	indel+
b0082	TE-InDel	B73	indel+		indel+
b0082	TE-InDel	By4960	NA
b0082	TE-InDel	By804	indel-
b0082	TE-InDel	CI7	indel+
b0082	TE-InDel	CIMBL105	indel-
b0082	TE-InDel	CIMBL114	indel-
b0082	TE-InDel	CIMBL145	indel+
b0082	TE-InDel	Dan340	indel-
b0082	TE-InDel	GEMS21	indel+
b0082	TE-InDel	HZS	indel+
b0082	TE-InDel	K22	indel-
b0082	TE-InDel	Mo17	indel-		indel-
b0082	TE-InDel	TY5	indel-
b0082	TE-InDel	Zheng30	indel-
b0082	TE-InDel	Zong31	indel-
b0083	TE-InDel	B110	NA
b0083	TE-InDel	B73	NA		indel+
b0083	TE-InDel	By4960	NA
b0083	TE-InDel	By804	NA
b0083	TE-InDel	CI7	indel+
b0083	TE-InDel	CIMBL105	indel-
b0083	TE-InDel	CIMBL114	indel-
b0083	TE-InDel	CIMBL145	NA
b0083	TE-InDel	Dan340	NA
b0083	TE-InDel	GEMS21	NA
b0083	TE-InDel	HZS	indel-
b0083	TE-InDel	K22	indel-
b0083	TE-InDel	Mo17	indel-		indel-
b0083	TE-InDel	TY5	indel-
b0083	TE-InDel	Zheng30	indel-
b0083	TE-InDel	Zong31	indel-
b0084	TE-InDel	B110	indel-
b0084	TE-InDel	B73	indel+		indel+
b0084	TE-InDel	By4960	indel+
b0084	TE-InDel	By804	indel-
b0084	TE-InDel	CI7	NA
b0084	TE-InDel	CIMBL105	indel-
b0084	TE-InDel	CIMBL114	indel-
b0084	TE-InDel	CIMBL145	NA
b0084	TE-InDel	Dan340	indel+
b0084	TE-InDel	GEMS21	indel+
b0084	TE-InDel	HZS	indel-
b0084	TE-InDel	K22	NA
b0084	TE-InDel	Mo17	indel-		indel-
b0084	TE-InDel	TY5	indel-
b0084	TE-InDel	Zheng30	indel+
b0084	TE-InDel	Zong31	indel-
b0085	none-TE-InDel	B110	indel+
b0085	none-TE-InDel	B73	indel-		indel-
b0085	none-TE-InDel	By4960	indel+
b0085	none-TE-InDel	By804	indel+
b0085	none-TE-InDel	CI7	indel+
b0085	none-TE-InDel	CIMBL105	indel-
b0085	none-TE-InDel	CIMBL114	indel+
b0085	none-TE-InDel	CIMBL145	NA
b0085	none-TE-InDel	Dan340	NA
b0085	none-TE-InDel	GEMS21	indel-
b0085	none-TE-InDel	HZS	NA
b0085	none-TE-InDel	K22	indel+
b0085	none-TE-InDel	Mo17	NA		indel+
b0085	none-TE-InDel	TY5	indel-
b0085	none-TE-InDel	Zheng30	indel+
b0085	none-TE-InDel	Zong31	NA
b0086	TE-InDel	B110	indel-
b0086	TE-InDel	B73	indel-		indel-
b0086	TE-InDel	By4960	NA
b0086	TE-InDel	By804	NA
b0086	TE-InDel	CI7	NA
b0086	TE-InDel	CIMBL105	indel-
b0086	TE-InDel	CIMBL114	indel-
b0086	TE-InDel	CIMBL145	indel-
b0086	TE-InDel	Dan340	indel-
b0086	TE-InDel	GEMS21	NA
b0086	TE-InDel	HZS	indel-
b0086	TE-InDel	K22	NA
b0086	TE-InDel	Mo17	indel+		indel+
b0086	TE-InDel	TY5	indel-
b0086	TE-InDel	Zheng30	indel-
b0086	TE-InDel	Zong31	indel-
b0087	TE-InDel	B110	indel-
b0087	TE-InDel	B73	indel+		indel+
b0087	TE-InDel	By4960	indel-
b0087	TE-InDel	By804	indel-
b0087	TE-InDel	CI7	indel-
b0087	TE-InDel	CIMBL105	indel-
b0087	TE-InDel	CIMBL114	NA
b0087	TE-InDel	CIMBL145	indel-
b0087	TE-InDel	Dan340	indel+
b0087	TE-InDel	GEMS21	indel+
b0087	TE-InDel	HZS	indel-
b0087	TE-InDel	K22	indel-
b0087	TE-InDel	Mo17	indel-		indel-
b0087	TE-InDel	TY5	indel-
b0087	TE-InDel	Zheng30	NA
b0087	TE-InDel	Zong31	indel-
b0088	TE-InDel	B110	indel-
b0088	TE-InDel	B73	indel+		indel+
b0088	TE-InDel	By4960	indel+
b0088	TE-InDel	By804	indel+
b0088	TE-InDel	CI7	indel+
b0088	TE-InDel	CIMBL105	indel-
b0088	TE-InDel	CIMBL114	indel+
b0088	TE-InDel	CIMBL145	indel-
b0088	TE-InDel	Dan340	indel+
b0088	TE-InDel	GEMS21	indel+
b0088	TE-InDel	HZS	indel+
b0088	TE-InDel	K22	indel-
b0088	TE-InDel	Mo17	indel-		indel-
b0088	TE-InDel	TY5	indel-
b0088	TE-InDel	Zheng30	NA
b0088	TE-InDel	Zong31	indel+
b0089	TE-InDel	B110	NA
b0089	TE-InDel	B73	indel-		indel-
b0089	TE-InDel	By4960	indel-
b0089	TE-InDel	By804	indel-
b0089	TE-InDel	CI7	NA
b0089	TE-InDel	CIMBL105	NA
b0089	TE-InDel	CIMBL114	indel-
b0089	TE-InDel	CIMBL145	NA
b0089	TE-InDel	Dan340	indel-
b0089	TE-InDel	GEMS21	indel-
b0089	TE-InDel	HZS	indel-
b0089	TE-InDel	K22	indel-
b0089	TE-InDel	Mo17	NA		indel+
b0089	TE-InDel	TY5	NA
b0089	TE-InDel	Zheng30	NA
b0089	TE-InDel	Zong31	NA
b0090	TE-InDel	B110	indel+
b0090	TE-InDel	B73	indel-		indel-
b0090	TE-InDel	By4960	NA
b0090	TE-InDel	By804	indel+
b0090	TE-InDel	CI7	indel-
b0090	TE-InDel	CIMBL105	NA
b0090	TE-InDel	CIMBL114	indel+
b0090	TE-InDel	CIMBL145	NA
b0090	TE-InDel	Dan340	indel-
b0090	TE-InDel	GEMS21	NA
b0090	TE-InDel	HZS	NA
b0090	TE-InDel	K22	NA
b0090	TE-InDel	Mo17	indel+		indel+
b0090	TE-InDel	TY5	indel+
b0090	TE-InDel	Zheng30	NA
b0090	TE-InDel	Zong31	indel-
b0091	TE-InDel	B110	indel+
b0091	TE-InDel	B73	indel+		indel+
b0091	TE-InDel	By4960	indel+
b0091	TE-InDel	By804	indel+
b0091	TE-InDel	CI7	indel+
b0091	TE-InDel	CIMBL105	NA
b0091	TE-InDel	CIMBL114	NA
b0091	TE-InDel	CIMBL145	indel+
b0091	TE-InDel	Dan340	indel+
b0091	TE-InDel	GEMS21	indel+
b0091	TE-InDel	HZS	NA
b0091	TE-InDel	K22	indel+
b0091	TE-InDel	Mo17	indel-		indel-
b0091	TE-InDel	TY5	indel+
b0091	TE-InDel	Zheng30	indel-
b0091	TE-InDel	Zong31	indel+
b0093	TE-InDel	B110	indel-
b0093	TE-InDel	B73	indel-		indel-
b0093	TE-InDel	By4960	indel-
b0093	TE-InDel	By804	NA
b0093	TE-InDel	CI7	indel-
b0093	TE-InDel	CIMBL105	NA
b0093	TE-InDel	CIMBL114	NA
b0093	TE-InDel	CIMBL145	NA
b0093	TE-InDel	Dan340	indel-
b0093	TE-InDel	GEMS21	indel-
b0093	TE-InDel	HZS	NA
b0093	TE-InDel	K22	NA
b0093	TE-InDel	Mo17	NA		indel+
b0093	TE-InDel	TY5	NA
b0093	TE-InDel	Zheng30	NA
b0093	TE-InDel	Zong31	NA
b0094	TE-InDel	B110	indel-
b0094	TE-InDel	B73	indel-		indel-
b0094	TE-InDel	By4960	NA
b0094	TE-InDel	By804	indel+
b0094	TE-InDel	CI7	NA
b0094	TE-InDel	CIMBL105	NA
b0094	TE-InDel	CIMBL114	NA
b0094	TE-InDel	CIMBL145	indel-
b0094	TE-InDel	Dan340	indel-
b0094	TE-InDel	GEMS21	indel-
b0094	TE-InDel	HZS	NA
b0094	TE-InDel	K22	indel-
b0094	TE-InDel	Mo17	NA		indel+
b0094	TE-InDel	TY5	indel+
b0094	TE-InDel	Zheng30	indel-
b0094	TE-InDel	Zong31	indel-
b0095	TE-InDel	B110	indel-
b0095	TE-InDel	B73	indel-		indel-
b0095	TE-InDel	By4960	NA
b0095	TE-InDel	By804	NA
b0095	TE-InDel	CI7	indel+
b0095	TE-InDel	CIMBL105	indel+
b0095	TE-InDel	CIMBL114	NA
b0095	TE-InDel	CIMBL145	NA
b0095	TE-InDel	Dan340	NA
b0095	TE-InDel	GEMS21	indel-
b0095	TE-InDel	HZS	indel+
b0095	TE-InDel	K22	indel-
b0095	TE-InDel	Mo17	NA		indel+
b0095	TE-InDel	TY5	indel+
b0095	TE-InDel	Zheng30	indel-
b0095	TE-InDel	Zong31	NA
b0096	TE-InDel	B110	indel+
b0096	TE-InDel	B73	indel+		indel+
b0096	TE-InDel	By4960	indel-
b0096	TE-InDel	By804	indel-
b0096	TE-InDel	CI7	indel-
b0096	TE-InDel	CIMBL105	indel-
b0096	TE-InDel	CIMBL114	indel-
b0096	TE-InDel	CIMBL145	indel+
b0096	TE-InDel	Dan340	indel+
b0096	TE-InDel	GEMS21	indel+
b0096	TE-InDel	HZS	NA
b0096	TE-InDel	K22	indel+
b0096	TE-InDel	Mo17	indel-		indel-
b0096	TE-InDel	TY5	indel-
b0096	TE-InDel	Zheng30	indel+
b0096	TE-InDel	Zong31	indel-
b0097	TE-InDel	B110	indel+
b0097	TE-InDel	B73	indel+		indel+
b0097	TE-InDel	By4960	indel-
b0097	TE-InDel	By804	indel-
b0097	TE-InDel	CI7	NA
b0097	TE-InDel	CIMBL105	indel-
b0097	TE-InDel	CIMBL114	indel+
b0097	TE-InDel	CIMBL145	indel+
b0097	TE-InDel	Dan340	indel+
b0097	TE-InDel	GEMS21	indel+
b0097	TE-InDel	HZS	NA
b0097	TE-InDel	K22	indel-
b0097	TE-InDel	Mo17	indel-		indel-
b0097	TE-InDel	TY5	indel-
b0097	TE-InDel	Zheng30	indel+
b0097	TE-InDel	Zong31	indel-
b0098	TE-InDel	B110	indel-
b0098	TE-InDel	B73	indel-		indel-
b0098	TE-InDel	By4960	indel-
b0098	TE-InDel	By804	NA
b0098	TE-InDel	CI7	indel+
b0098	TE-InDel	CIMBL105	indel+
b0098	TE-InDel	CIMBL114	indel+
b0098	TE-InDel	CIMBL145	NA
b0098	TE-InDel	Dan340	NA
b0098	TE-InDel	GEMS21	NA
b0098	TE-InDel	HZS	indel+
b0098	TE-InDel	K22	indel-
b0098	TE-InDel	Mo17	indel+		indel+
b0098	TE-InDel	TY5	NA
b0098	TE-InDel	Zheng30	NA
b0098	TE-InDel	Zong31	indel+
b0099	TE-InDel	B110	indel-
b0099	TE-InDel	B73	indel-		indel-
b0099	TE-InDel	By4960	indel-
b0099	TE-InDel	By804	indel+
b0099	TE-InDel	CI7	NA
b0099	TE-InDel	CIMBL105	indel-
b0099	TE-InDel	CIMBL114	indel+
b0099	TE-InDel	CIMBL145	NA
b0099	TE-InDel	Dan340	indel+
b0099	TE-InDel	GEMS21	indel-
b0099	TE-InDel	HZS	indel+
b0099	TE-InDel	K22	indel+
b0099	TE-InDel	Mo17	indel+		indel+
b0099	TE-InDel	TY5	indel+
b0099	TE-InDel	Zheng30	indel+
b0099	TE-InDel	Zong31	NA
b0100	TE-InDel	B110	indel+
b0100	TE-InDel	B73	indel+		indel+
b0100	TE-InDel	By4960	indel+
b0100	TE-InDel	By804	NA
b0100	TE-InDel	CI7	NA
b0100	TE-InDel	CIMBL105	indel+
b0100	TE-InDel	CIMBL114	indel-
b0100	TE-InDel	CIMBL145	indel+
b0100	TE-InDel	Dan340	indel-
b0100	TE-InDel	GEMS21	indel+
b0100	TE-InDel	HZS	indel-
b0100	TE-InDel	K22	indel-
b0100	TE-InDel	Mo17	indel-		indel-
b0100	TE-InDel	TY5	indel-
b0100	TE-InDel	Zheng30	indel-
b0100	TE-InDel	Zong31	indel-
b0101	TE-InDel	B110	NA
b0101	TE-InDel	B73	indel-		indel-
b0101	TE-InDel	By4960	NA
b0101	TE-InDel	By804	indel+
b0101	TE-InDel	CI7	indel-
b0101	TE-InDel	CIMBL105	indel+
b0101	TE-InDel	CIMBL114	NA
b0101	TE-InDel	CIMBL145	NA
b0101	TE-InDel	Dan340	indel+
b0101	TE-InDel	GEMS21	NA
b0101	TE-InDel	HZS	indel+
b0101	TE-InDel	K22	indel+
b0101	TE-InDel	Mo17	indel+		indel+
b0101	TE-InDel	TY5	indel+
b0101	TE-InDel	Zheng30	indel+
b0101	TE-InDel	Zong31	NA
b0102	TE-InDel	B110	indel+
b0102	TE-InDel	B73	indel+		indel+
b0102	TE-InDel	By4960	indel-
b0102	TE-InDel	By804	NA
b0102	TE-InDel	CI7	indel-
b0102	TE-InDel	CIMBL105	indel-
b0102	TE-InDel	CIMBL114	indel-
b0102	TE-InDel	CIMBL145	indel+
b0102	TE-InDel	Dan340	NA
b0102	TE-InDel	GEMS21	indel+
b0102	TE-InDel	HZS	indel-
b0102	TE-InDel	K22	NA
b0102	TE-InDel	Mo17	indel-		indel-
b0102	TE-InDel	TY5	indel-
b0102	TE-InDel	Zheng30	NA
b0102	TE-InDel	Zong31	indel-
b0103	TE-InDel	B110	indel-
b0103	TE-InDel	B73	indel-		indel-
b0103	TE-InDel	By4960	indel-
b0103	TE-InDel	By804	NA
b0103	TE-InDel	CI7	NA
b0103	TE-InDel	CIMBL105	NA
b0103	TE-InDel	CIMBL114	NA
b0103	TE-InDel	CIMBL145	indel-
b0103	TE-InDel	Dan340	NA
b0103	TE-InDel	GEMS21	indel-
b0103	TE-InDel	HZS	indel-
b0103	TE-InDel	K22	NA
b0103	TE-InDel	Mo17	indel+		indel+
b0103	TE-InDel	TY5	indel+
b0103	TE-InDel	Zheng30	NA
b0103	TE-InDel	Zong31	NA
b0104	TE-InDel	B110	indel+
b0104	TE-InDel	B73	indel+		indel+
b0104	TE-InDel	By4960	indel-
b0104	TE-InDel	By804	indel-
b0104	TE-InDel	CI7	indel-
b0104	TE-InDel	CIMBL105	indel-
b0104	TE-InDel	CIMBL114	indel+
b0104	TE-InDel	CIMBL145	indel+
b0104	TE-InDel	Dan340	indel-
b0104	TE-InDel	GEMS21	indel+
b0104	TE-InDel	HZS	indel+
b0104	TE-InDel	K22	indel-
b0104	TE-InDel	Mo17	indel-		indel-
b0104	TE-InDel	TY5	indel-
b0104	TE-InDel	Zheng30	indel-
b0104	TE-InDel	Zong31	indel-
b0106	TE-InDel	B110	indel+
b0106	TE-InDel	B73	indel-		indel-
b0106	TE-InDel	By4960	NA
b0106	TE-InDel	By804	NA
b0106	TE-InDel	CI7	NA
b0106	TE-InDel	CIMBL105	NA
b0106	TE-InDel	CIMBL114	NA
b0106	TE-InDel	CIMBL145	NA
b0106	TE-InDel	Dan340	NA
b0106	TE-InDel	GEMS21	indel-
b0106	TE-InDel	HZS	NA
b0106	TE-InDel	K22	NA
b0106	TE-InDel	Mo17	NA		indel+
b0106	TE-InDel	TY5	indel+
b0106	TE-InDel	Zheng30	NA
b0106	TE-InDel	Zong31	NA
b0107	TE-InDel	B110	indel-
b0107	TE-InDel	B73	indel+		indel+
b0107	TE-InDel	By4960	indel-
b0107	TE-InDel	By804	indel-
b0107	TE-InDel	CI7	indel-
b0107	TE-InDel	CIMBL105	indel+
b0107	TE-InDel	CIMBL114	indel-
b0107	TE-InDel	CIMBL145	indel-
b0107	TE-InDel	Dan340	indel-
b0107	TE-InDel	GEMS21	indel+
b0107	TE-InDel	HZS	indel+
b0107	TE-InDel	K22	indel-
b0107	TE-InDel	Mo17	indel-		indel-
b0107	TE-InDel	TY5	indel-
b0107	TE-InDel	Zheng30	indel-
b0107	TE-InDel	Zong31	indel-
b0108	TE-InDel	B110	indel-
b0108	TE-InDel	B73	indel-		indel-
b0108	TE-InDel	By4960	indel-
b0108	TE-InDel	By804	NA
b0108	TE-InDel	CI7	indel-
b0108	TE-InDel	CIMBL105	indel-
b0108	TE-InDel	CIMBL114	NA
b0108	TE-InDel	CIMBL145	indel-
b0108	TE-InDel	Dan340	indel-
b0108	TE-InDel	GEMS21	indel-
b0108	TE-InDel	HZS	indel-
b0108	TE-InDel	K22	NA
b0108	TE-InDel	Mo17	NA		indel+
b0108	TE-InDel	TY5	indel-
b0108	TE-InDel	Zheng30	indel-
b0108	TE-InDel	Zong31	NA
b0109	TE-InDel	B110	NA
b0109	TE-InDel	B73	indel-		indel-
b0109	TE-InDel	By4960	NA
b0109	TE-InDel	By804	NA
b0109	TE-InDel	CI7	indel-
b0109	TE-InDel	CIMBL105	indel-
b0109	TE-InDel	CIMBL114	NA
b0109	TE-InDel	CIMBL145	NA
b0109	TE-InDel	Dan340	NA
b0109	TE-InDel	GEMS21	indel-
b0109	TE-InDel	HZS	NA
b0109	TE-InDel	K22	indel+
b0109	TE-InDel	Mo17	indel+		indel+
b0109	TE-InDel	TY5	NA
b0109	TE-InDel	Zheng30	NA
b0109	TE-InDel	Zong31	NA
b0110	TE-InDel	B110	indel+
b0110	TE-InDel	B73	indel+		indel+
b0110	TE-InDel	By4960	indel+
b0110	TE-InDel	By804	NA
b0110	TE-InDel	CI7	NA
b0110	TE-InDel	CIMBL105	indel-
b0110	TE-InDel	CIMBL114	indel-
b0110	TE-InDel	CIMBL145	indel+
b0110	TE-InDel	Dan340	NA
b0110	TE-InDel	GEMS21	indel+
b0110	TE-InDel	HZS	NA
b0110	TE-InDel	K22	indel-
b0110	TE-InDel	Mo17	indel-		indel-
b0110	TE-InDel	TY5	indel+
b0110	TE-InDel	Zheng30	indel+
b0110	TE-InDel	Zong31	indel-
b0111	TE-InDel	B110	indel-
b0111	TE-InDel	B73	indel-		indel-
b0111	TE-InDel	By4960	indel-
b0111	TE-InDel	By804	NA
b0111	TE-InDel	CI7	indel-
b0111	TE-InDel	CIMBL105	NA
b0111	TE-InDel	CIMBL114	NA
b0111	TE-InDel	CIMBL145	indel-
b0111	TE-InDel	Dan340	indel-
b0111	TE-InDel	GEMS21	indel-
b0111	TE-InDel	HZS	indel-
b0111	TE-InDel	K22	indel+
b0111	TE-InDel	Mo17	NA		indel+
b0111	TE-InDel	TY5	NA
b0111	TE-InDel	Zheng30	NA
b0111	TE-InDel	Zong31	indel-
b0112	TE-InDel	B110	indel+
b0112	TE-InDel	B73	indel-		indel-
b0112	TE-InDel	By4960	NA
b0112	TE-InDel	By804	indel-
b0112	TE-InDel	CI7	NA
b0112	TE-InDel	CIMBL105	indel-
b0112	TE-InDel	CIMBL114	indel-
b0112	TE-InDel	CIMBL145	indel+
b0112	TE-InDel	Dan340	indel+
b0112	TE-InDel	GEMS21	indel-
b0112	TE-InDel	HZS	indel-
b0112	TE-InDel	K22	indel+
b0112	TE-InDel	Mo17	indel+		indel+
b0112	TE-InDel	TY5	NA
b0112	TE-InDel	Zheng30	indel-
b0112	TE-InDel	Zong31	indel-
b0113	TE-InDel	B110	indel-
b0113	TE-InDel	B73	indel+		indel+
b0113	TE-InDel	By4960	indel+
b0113	TE-InDel	By804	indel-
b0113	TE-InDel	CI7	indel-
b0113	TE-InDel	CIMBL105	indel-
b0113	TE-InDel	CIMBL114	indel-
b0113	TE-InDel	CIMBL145	indel-
b0113	TE-InDel	Dan340	indel-
b0113	TE-InDel	GEMS21	indel+
b0113	TE-InDel	HZS	indel-
b0113	TE-InDel	K22	indel-
b0113	TE-InDel	Mo17	indel-		indel-
b0113	TE-InDel	TY5	indel-
b0113	TE-InDel	Zheng30	indel-
b0113	TE-InDel	Zong31	NA
b0114	TE-InDel	B110	indel+
b0114	TE-InDel	B73	indel-		indel-
b0114	TE-InDel	By4960	indel-
b0114	TE-InDel	By804	NA
b0114	TE-InDel	CI7	NA
b0114	TE-InDel	CIMBL105	indel-
b0114	TE-InDel	CIMBL114	indel-
b0114	TE-InDel	CIMBL145	indel+
b0114	TE-InDel	Dan340	NA
b0114	TE-InDel	GEMS21	NA
b0114	TE-InDel	HZS	indel-
b0114	TE-InDel	K22	indel+
b0114	TE-InDel	Mo17	indel+		indel+
b0114	TE-InDel	TY5	indel-
b0114	TE-InDel	Zheng30	indel-
b0114	TE-InDel	Zong31	NA
b0115	TE-InDel	B110	indel+
b0115	TE-InDel	B73	indel+		indel+
b0115	TE-InDel	By4960	NA
b0115	TE-InDel	By804	indel+
b0115	TE-InDel	CI7	indel-
b0115	TE-InDel	CIMBL105	NA
b0115	TE-InDel	CIMBL114	indel-
b0115	TE-InDel	CIMBL145	indel+
b0115	TE-InDel	Dan340	indel+
b0115	TE-InDel	GEMS21	indel+
b0115	TE-InDel	HZS	indel-
b0115	TE-InDel	K22	NA
b0115	TE-InDel	Mo17	indel-		indel-
b0115	TE-InDel	TY5	indel-
b0115	TE-InDel	Zheng30	indel-
b0115	TE-InDel	Zong31	indel+
b0117	TE-InDel	B110	indel-
b0117	TE-InDel	B73	indel-		indel-
b0117	TE-InDel	By4960	NA
b0117	TE-InDel	By804	indel-
b0117	TE-InDel	CI7	indel-
b0117	TE-InDel	CIMBL105	indel-
b0117	TE-InDel	CIMBL114	NA
b0117	TE-InDel	CIMBL145	indel-
b0117	TE-InDel	Dan340	indel-
b0117	TE-InDel	GEMS21	indel-
b0117	TE-InDel	HZS	indel-
b0117	TE-InDel	K22	indel+
b0117	TE-InDel	Mo17	indel+		indel+
b0117	TE-InDel	TY5	indel-
b0117	TE-InDel	Zheng30	indel-
b0117	TE-InDel	Zong31	NA
b0118	TE-InDel	B110	indel+
b0118	TE-InDel	B73	indel+		indel+
b0118	TE-InDel	By4960	indel-
b0118	TE-InDel	By804	NA
b0118	TE-InDel	CI7	indel-
b0118	TE-InDel	CIMBL105	indel-
b0118	TE-InDel	CIMBL114	indel-
b0118	TE-InDel	CIMBL145	indel+
b0118	TE-InDel	Dan340	NA
b0118	TE-InDel	GEMS21	indel+
b0118	TE-InDel	HZS	indel-
b0118	TE-InDel	K22	indel-
b0118	TE-InDel	Mo17	indel-		indel-
b0118	TE-InDel	TY5	NA
b0118	TE-InDel	Zheng30	indel+
b0118	TE-InDel	Zong31	indel-
b0119	TE-InDel	B110	indel+
b0119	TE-InDel	B73	indel+		indel+
b0119	TE-InDel	By4960	indel+
b0119	TE-InDel	By804	indel+
b0119	TE-InDel	CI7	NA
b0119	TE-InDel	CIMBL105	indel+
b0119	TE-InDel	CIMBL114	indel-
b0119	TE-InDel	CIMBL145	indel+
b0119	TE-InDel	Dan340	indel-
b0119	TE-InDel	GEMS21	indel+
b0119	TE-InDel	HZS	indel-
b0119	TE-InDel	K22	indel-
b0119	TE-InDel	Mo17	indel-		indel-
b0119	TE-InDel	TY5	indel+
b0119	TE-InDel	Zheng30	indel-
b0119	TE-InDel	Zong31	indel+
b0120	TE-InDel	B110	indel-
b0120	TE-InDel	B73	indel-		indel-
b0120	TE-InDel	By4960	indel+
b0120	TE-InDel	By804	indel+
b0120	TE-InDel	CI7	indel-
b0120	TE-InDel	CIMBL105	indel-
b0120	TE-InDel	CIMBL114	NA
b0120	TE-InDel	CIMBL145	indel-
b0120	TE-InDel	Dan340	indel-
b0120	TE-InDel	GEMS21	indel-
b0120	TE-InDel	HZS	indel-
b0120	TE-InDel	K22	indel-
b0120	TE-InDel	Mo17	indel+		indel+
b0120	TE-InDel	TY5	indel+
b0120	TE-InDel	Zheng30	indel-
b0120	TE-InDel	Zong31	indel-
b0121	TE-InDel	B110	indel-
b0121	TE-InDel	B73	indel-		indel-
b0121	TE-InDel	By4960	indel+
b0121	TE-InDel	By804	indel+
b0121	TE-InDel	CI7	indel-
b0121	TE-InDel	CIMBL105	NA
b0121	TE-InDel	CIMBL114	NA
b0121	TE-InDel	CIMBL145	NA
b0121	TE-InDel	Dan340	NA
b0121	TE-InDel	GEMS21	indel-
b0121	TE-InDel	HZS	NA
b0121	TE-InDel	K22	NA
b0121	TE-InDel	Mo17	NA		indel+
b0121	TE-InDel	TY5	NA
b0121	TE-InDel	Zheng30	indel-
b0121	TE-InDel	Zong31	NA
b0122	TE-InDel	B110	indel-
b0122	TE-InDel	B73	indel+		indel+
b0122	TE-InDel	By4960	indel-
b0122	TE-InDel	By804	indel-
b0122	TE-InDel	CI7	indel-
b0122	TE-InDel	CIMBL105	indel-
b0122	TE-InDel	CIMBL114	indel-
b0122	TE-InDel	CIMBL145	indel+
b0122	TE-InDel	Dan340	NA
b0122	TE-InDel	GEMS21	indel+
b0122	TE-InDel	HZS	indel-
b0122	TE-InDel	K22	indel-
b0122	TE-InDel	Mo17	indel-		indel-
b0122	TE-InDel	TY5	indel-
b0122	TE-InDel	Zheng30	indel-
b0122	TE-InDel	Zong31	indel-
b0124	TE-InDel	B110	indel-
b0124	TE-InDel	B73	NA		indel-
b0124	TE-InDel	By4960	indel+
b0124	TE-InDel	By804	indel-
b0124	TE-InDel	CI7	NA
b0124	TE-InDel	CIMBL105	indel-
b0124	TE-InDel	CIMBL114	indel+
b0124	TE-InDel	CIMBL145	indel-
b0124	TE-InDel	Dan340	indel-
b0124	TE-InDel	GEMS21	indel-
b0124	TE-InDel	HZS	indel-
b0124	TE-InDel	K22	indel-
b0124	TE-InDel	Mo17	indel+		indel+
b0124	TE-InDel	TY5	NA
b0124	TE-InDel	Zheng30	indel-
b0124	TE-InDel	Zong31	NA
b0125	TE-InDel	B110	NA
b0125	TE-InDel	B73	indel-		indel-
b0125	TE-InDel	By4960	indel+
b0125	TE-InDel	By804	indel-
b0125	TE-InDel	CI7	indel-
b0125	TE-InDel	CIMBL105	indel+
b0125	TE-InDel	CIMBL114	indel+
b0125	TE-InDel	CIMBL145	indel+
b0125	TE-InDel	Dan340	indel+
b0125	TE-InDel	GEMS21	indel+
b0125	TE-InDel	HZS	indel+
b0125	TE-InDel	K22	indel+
b0125	TE-InDel	Mo17	indel+		indel+
b0125	TE-InDel	TY5	indel+
b0125	TE-InDel	Zheng30	indel+
b0125	TE-InDel	Zong31	NA
b0126	TE-InDel	B110	indel+
b0126	TE-InDel	B73	indel+		indel+
b0126	TE-InDel	By4960	indel-
b0126	TE-InDel	By804	indel-
b0126	TE-InDel	CI7	indel-
b0126	TE-InDel	CIMBL105	indel-
b0126	TE-InDel	CIMBL114	indel+
b0126	TE-InDel	CIMBL145	NA
b0126	TE-InDel	Dan340	indel-
b0126	TE-InDel	GEMS21	indel+
b0126	TE-InDel	HZS	indel-
b0126	TE-InDel	K22	indel-
b0126	TE-InDel	Mo17	indel-		indel-
b0126	TE-InDel	TY5	indel+
b0126	TE-InDel	Zheng30	indel+
b0126	TE-InDel	Zong31	indel+
b0127	TE-InDel	B110	indel-
b0127	TE-InDel	B73	indel-		indel-
b0127	TE-InDel	By4960	indel-
b0127	TE-InDel	By804	indel-
b0127	TE-InDel	CI7	indel-
b0127	TE-InDel	CIMBL105	indel-
b0127	TE-InDel	CIMBL114	indel-
b0127	TE-InDel	CIMBL145	indel-
b0127	TE-InDel	Dan340	NA
b0127	TE-InDel	GEMS21	indel-
b0127	TE-InDel	HZS	NA
b0127	TE-InDel	K22	indel-
b0127	TE-InDel	Mo17	indel+		indel+
b0127	TE-InDel	TY5	indel-
b0127	TE-InDel	Zheng30	indel-
b0127	TE-InDel	Zong31	indel-
b0128	TE-InDel	B110	indel-
b0128	TE-InDel	B73	indel-		indel-
b0128	TE-InDel	By4960	indel-
b0128	TE-InDel	By804	indel-
b0128	TE-InDel	CI7	indel-
b0128	TE-InDel	CIMBL105	indel-
b0128	TE-InDel	CIMBL114	NA
b0128	TE-InDel	CIMBL145	NA
b0128	TE-InDel	Dan340	indel-
b0128	TE-InDel	GEMS21	NA
b0128	TE-InDel	HZS	indel-
b0128	TE-InDel	K22	NA
b0128	TE-InDel	Mo17	NA		indel+
b0128	TE-InDel	TY5	indel-
b0128	TE-InDel	Zheng30	NA
b0128	TE-InDel	Zong31	NA
b0129	TE-InDel	B110	indel+
b0129	TE-InDel	B73	indel+		indel+
b0129	TE-InDel	By4960	indel+
b0129	TE-InDel	By804	indel+
b0129	TE-InDel	CI7	indel+
b0129	TE-InDel	CIMBL105	indel-
b0129	TE-InDel	CIMBL114	indel+
b0129	TE-InDel	CIMBL145	indel+
b0129	TE-InDel	Dan340	indel+
b0129	TE-InDel	GEMS21	indel+
b0129	TE-InDel	HZS	NA
b0129	TE-InDel	K22	indel+
b0129	TE-InDel	Mo17	indel-		indel-
b0129	TE-InDel	TY5	NA
b0129	TE-InDel	Zheng30	indel+
b0129	TE-InDel	Zong31	indel+
b0130	TE-InDel	B110	NA
b0130	TE-InDel	B73	indel-		indel-
b0130	TE-InDel	By4960	NA
b0130	TE-InDel	By804	NA
b0130	TE-InDel	CI7	NA
b0130	TE-InDel	CIMBL105	NA
b0130	TE-InDel	CIMBL114	NA
b0130	TE-InDel	CIMBL145	NA
b0130	TE-InDel	Dan340	NA
b0130	TE-InDel	GEMS21	NA
b0130	TE-InDel	HZS	indel+
b0130	TE-InDel	K22	NA
b0130	TE-InDel	Mo17	indel+		indel+
b0130	TE-InDel	TY5	NA
b0130	TE-InDel	Zheng30	NA
b0130	TE-InDel	Zong31	indel+
b0131	none-TE-InDel	B110	indel+
b0131	none-TE-InDel	B73	indel-		indel-
b0131	none-TE-InDel	By4960	indel+
b0131	none-TE-InDel	By804	indel+
b0131	none-TE-InDel	CI7	NA
b0131	none-TE-InDel	CIMBL105	indel-
b0131	none-TE-InDel	CIMBL114	indel-
b0131	none-TE-InDel	CIMBL145	NA
b0131	none-TE-InDel	Dan340	indel+
b0131	none-TE-InDel	GEMS21	indel+
b0131	none-TE-InDel	HZS	NA
b0131	none-TE-InDel	K22	indel+
b0131	none-TE-InDel	Mo17	indel+		indel+
b0131	none-TE-InDel	TY5	NA
b0131	none-TE-InDel	Zheng30	indel+
b0131	none-TE-InDel	Zong31	NA
b0132	TE-InDel	B110	indel+
b0132	TE-InDel	B73	indel-		indel-
b0132	TE-InDel	By4960	indel+
b0132	TE-InDel	By804	indel+
b0132	TE-InDel	CI7	indel-
b0132	TE-InDel	CIMBL105	indel-
b0132	TE-InDel	CIMBL114	indel-
b0132	TE-InDel	CIMBL145	indel+
b0132	TE-InDel	Dan340	indel+
b0132	TE-InDel	GEMS21	NA
b0132	TE-InDel	HZS	indel-
b0132	TE-InDel	K22	indel+
b0132	TE-InDel	Mo17	indel+		indel+
b0132	TE-InDel	TY5	indel-
b0132	TE-InDel	Zheng30	indel+
b0132	TE-InDel	Zong31	NA
b0134	TE-InDel	B110	NA	indel-
b0134	TE-InDel	B73	indel-	indel-	indel-
b0134	TE-InDel	By4960	indel-	NA
b0134	TE-InDel	By804	indel-	NA
b0134	TE-InDel	CI7	indel-	indel-
b0134	TE-InDel	CIMBL105	indel-	indel-
b0134	TE-InDel	CIMBL114	indel-	indel-
b0134	TE-InDel	CIMBL145	indel-	indel+
b0134	TE-InDel	Dan340	indel-	indel-
b0134	TE-InDel	GEMS21	NA	indel+
b0134	TE-InDel	HZS	indel+	indel+
b0134	TE-InDel	K22	indel+	NA
b0134	TE-InDel	Mo17	NA	indel+	indel+
b0134	TE-InDel	TY5	indel-	NA
b0134	TE-InDel	Zheng30	indel+	indel+
b0134	TE-InDel	Zong31	indel-	indel-
b0135	TE-InDel	B110	NA
b0135	TE-InDel	B73	indel-		indel-
b0135	TE-InDel	By4960	NA
b0135	TE-InDel	By804	NA
b0135	TE-InDel	CI7	indel-
b0135	TE-InDel	CIMBL105	indel-
b0135	TE-InDel	CIMBL114	indel-
b0135	TE-InDel	CIMBL145	indel-
b0135	TE-InDel	Dan340	indel-
b0135	TE-InDel	GEMS21	indel+
b0135	TE-InDel	HZS	NA
b0135	TE-InDel	K22	indel+
b0135	TE-InDel	Mo17	NA		indel+
b0135	TE-InDel	TY5	indel-
b0135	TE-InDel	Zheng30	indel+
b0135	TE-InDel	Zong31	indel-
b0136	TE-InDel	B110	NA
b0136	TE-InDel	B73	indel-		indel-
b0136	TE-InDel	By4960	NA
b0136	TE-InDel	By804	NA
b0136	TE-InDel	CI7	NA
b0136	TE-InDel	CIMBL105	indel-
b0136	TE-InDel	CIMBL114	indel-
b0136	TE-InDel	CIMBL145	NA
b0136	TE-InDel	Dan340	NA
b0136	TE-InDel	GEMS21	indel-
b0136	TE-InDel	HZS	indel-
b0136	TE-InDel	K22	indel-
b0136	TE-InDel	Mo17	NA		indel+
b0136	TE-InDel	TY5	NA
b0136	TE-InDel	Zheng30	NA
b0136	TE-InDel	Zong31	NA
b0138	TE-InDel	B110	indel-
b0138	TE-InDel	B73	indel-		indel-
b0138	TE-InDel	By4960	NA
b0138	TE-InDel	By804	NA
b0138	TE-InDel	CI7	indel-
b0138	TE-InDel	CIMBL105	indel-
b0138	TE-InDel	CIMBL114	indel-
b0138	TE-InDel	CIMBL145	indel-
b0138	TE-InDel	Dan340	indel-
b0138	TE-InDel	GEMS21	indel-
b0138	TE-InDel	HZS	NA
b0138	TE-InDel	K22	indel-
b0138	TE-InDel	Mo17	NA		indel+
b0138	TE-InDel	TY5	indel-
b0138	TE-InDel	Zheng30	indel-
b0138	TE-InDel	Zong31	indel-
b0139	TE-InDel	B110	indel-
b0139	TE-InDel	B73	indel+		indel+
b0139	TE-InDel	By4960	indel-
b0139	TE-InDel	By804	indel-
b0139	TE-InDel	CI7	indel-
b0139	TE-InDel	CIMBL105	indel-
b0139	TE-InDel	CIMBL114	indel-
b0139	TE-InDel	CIMBL145	NA
b0139	TE-InDel	Dan340	indel-
b0139	TE-InDel	GEMS21	indel-
b0139	TE-InDel	HZS	indel-
b0139	TE-InDel	K22	indel-
b0139	TE-InDel	Mo17	indel-		indel-
b0139	TE-InDel	TY5	indel-
b0139	TE-InDel	Zheng30	indel-
b0139	TE-InDel	Zong31	indel-
b0140	TE-InDel	B110	NA
b0140	TE-InDel	B73	indel-		indel-
b0140	TE-InDel	By4960	NA
b0140	TE-InDel	By804	NA
b0140	TE-InDel	CI7	NA
b0140	TE-InDel	CIMBL105	indel+
b0140	TE-InDel	CIMBL114	indel+
b0140	TE-InDel	CIMBL145	NA
b0140	TE-InDel	Dan340	indel+
b0140	TE-InDel	GEMS21	NA
b0140	TE-InDel	HZS	indel+
b0140	TE-InDel	K22	indel-
b0140	TE-InDel	Mo17	indel+		indel+
b0140	TE-InDel	TY5	indel+
b0140	TE-InDel	Zheng30	indel-
b0140	TE-InDel	Zong31	indel-
b0141	TE-InDel	B110	NA
b0141	TE-InDel	B73	indel-		indel-
b0141	TE-InDel	By4960	NA
b0141	TE-InDel	By804	NA
b0141	TE-InDel	CI7	indel-
b0141	TE-InDel	CIMBL105	NA
b0141	TE-InDel	CIMBL114	NA
b0141	TE-InDel	CIMBL145	indel+
b0141	TE-InDel	Dan340	NA
b0141	TE-InDel	GEMS21	NA
b0141	TE-InDel	HZS	NA
b0141	TE-InDel	K22	indel-
b0141	TE-InDel	Mo17	NA		indel+
b0141	TE-InDel	TY5	NA
b0141	TE-InDel	Zheng30	NA
b0141	TE-InDel	Zong31	indel-
b0145	TE-InDel	B110	indel+
b0145	TE-InDel	B73	indel+		indel+
b0145	TE-InDel	By4960	indel+
b0145	TE-InDel	By804	indel+
b0145	TE-InDel	CI7	NA
b0145	TE-InDel	CIMBL105	indel+
b0145	TE-InDel	CIMBL114	indel-
b0145	TE-InDel	CIMBL145	indel+
b0145	TE-InDel	Dan340	NA
b0145	TE-InDel	GEMS21	indel-
b0145	TE-InDel	HZS	indel+
b0145	TE-InDel	K22	indel+
b0145	TE-InDel	Mo17	indel-		indel-
b0145	TE-InDel	TY5	indel+
[truncated: 14,770 more rows]
